# Supplementary material for: Autoregulation of Th1-mediated inflammation by twist1
Source: PubMed Central journal article supplement — J Exp Med. 2008 Aug 4;205(8):1889–901. doi: 10.1084/jem.20072468 (PMC2525589; doi:10.1084/jem.20072468), 2008-08-04
Supplement: jem.20072468_10.pdf [file jem.20072468_10.pdf]

**Table S1.** Genes differentially expressed in once- versus four-time stimulated Th1 cells

| Affymetr_No | Gene symbol   | Gene name                                              | Fold change | t test<br>P value |
|-------------|---------------|--------------------------------------------------------|-------------|-------------------|
| 97994_at    | Tcf7          | Transcription factor 7, T cell specific                | -50.7       | 6.47485E-09       |
| 104578_f_at | 3110023F10Rik | RIKEN cDNA 3110023F10 gene                             | -11.9       | 7.10526E-09       |
| 102282_g_at | Tnfrsf7       | TNF receptor superfamily, member 7                     | -7.2        | 3.15546E-05       |
| 160667_at   | Evl           | Ena-vasodilator stimulated phosphoprotein              | -6.6        | 3.20332E-07       |
| 96672_at    | 2300002F06Rik | RIKEN cDNA 2300002F06 gene                             | 3.4         | 0.000107159       |
| 95333_at    | Il18rap       | IL-18 receptor accessory protein                       | 3.4         | 9.00834E-06       |
| 102914_s_at | Bcl2a1b       | B cell leukemia/lymphoma 2 related protein A1b         | 3.5         | 2.70088E-07       |
| 97885_at    | 1810009M01Rik | RIKEN cDNA 1810009M01 gene                             | 4.2         | 1.42213E-07       |
| 97949_at    | Fgl2          | fibrinogen-like protein 2                              | 4.4         | 9.86764E-07       |
| 96605_at    | 0610011I04Rik | RIKEN cDNA 0610011I04 gene                             | 4.7         | 9.8031E-07        |
| 99370_at    | Klrc1         | Killer cell lectin-like receptor subfamily C, member 1 | 7.5         | 4.1522E-07        |
| 103024_at   | Adam8         | A disintegrin and metalloprotease domain 8             | 9.9         | 7.20938E-06       |
| 99051_at    | S100A4        | S100 calcium binding protein A4                        | 10.5        | 1.27979E-06       |
| 97519_at    | Spp1          | Secreted phosphoprotein 1                              | 12.9        | 1.84635E-06       |
| 99957_at    | Mmp9          | Matrix metalloproteinase 9                             | 19.0        | 9.75999E-07       |
| 98028_at    | Twist1        | Twist gene homolog, ( <i>Drosophila</i> )              | 38.8        | 7.14961E-05       |

Naïve DO11.10 cells were activated under Th1-polarizing conditions. The transcriptional profiles of resting 6-d-old Th1 cells and resting 24-d-old Th1 cells were compared using Affymetrix Murine Genome (MG) U74Av2 GeneChip arrays. The Affymetrix probe set ID (Affymetr\_No), mean fold change, significance of differential expression (t test), and mean signal intensity (Th1 6 d, Th1 24 d) of three arrays per group representing three independent cultures are shown. Genes were filtered according to the following criteria: fold change  $\geq 2$ ; difference of means  $\geq 200$ ; P value  $\leq 0.05$ .

**Table S2.** Clinical characteristics of patients in the study

| Patient ID                                                       | Relative <i>twist1</i> mRNA | Sex (male/female) | Age (yr) | Sampling Date (mo/yr) | Disease duration (yr) | ESR               | CRP (mg/l) |
|------------------------------------------------------------------|-----------------------------|-------------------|----------|-----------------------|-----------------------|-------------------|------------|
| <b>Endoscopic biopsies from ulcerative colitis (UC) patients</b> |                             |                   |          |                       |                       |                   |            |
| UC1                                                              | 414.8                       | m                 | 48       | 01/04                 | 3                     | 103               | 0.4        |
| UC1                                                              | 195.7                       |                   |          | 04/04                 |                       | 88                | 0.3        |
| UC2                                                              | 47.6                        | m                 | 30       | 05/04                 | 9                     | 63                | 1.7        |
| UC3                                                              | 32.8                        | f                 | 38       | 11/04                 | 8                     | 94                | 9.13       |
| UC4                                                              | 27.3                        | f                 | 33       | 12/04                 | 6                     | NA                | 19.6       |
| UC5                                                              | 2.7                         | m                 | 26       | 12/04                 | <1                    | NA                | 49.8       |
| UC6                                                              | 83.0                        | m                 | 42       | 7/05                  | 6                     | NA                | 3.5        |
| UC7                                                              | 47.4                        | m                 | 44       | 8/05                  | 5                     | NA                | 14.9       |
| UC8                                                              | 40.7                        | m                 | 18       | 11/05                 | 2                     | 30                | 10         |
| UC9                                                              | 10.9                        | m                 | 67       | 12/05                 | 15                    | 88                | 25         |
| <b>Endoscopic biopsies from Crohn's disease patients</b>         |                             |                   |          |                       |                       |                   |            |
| CD1                                                              | 72.9                        | m                 | 25       | 12/04                 | 4                     | NA                | 43         |
| CD2                                                              | 27.9                        | f                 | 45       | 2/05                  | 11                    | NA                | NA         |
| CD3                                                              | 23.8                        | f                 | 41       | 3/05                  | <1                    | NA                | 114.4      |
| CD4                                                              | 31.8                        | f                 | 22       | 7/05                  | 3                     | NA                | 31.3       |
| CD5                                                              | 12.7                        | f                 | 34       | 8/05                  | 5                     | NA                | 53.4       |
| CD6                                                              | 13.3                        | f                 | 21       | 11/05                 | 5                     | 27                | 10         |
| CD7                                                              | 27.8                        | f                 | 39       | 12/05                 | 10                    | 95                | 18         |
| <b>Synovial fluid from rheumatoid arthritis patients</b>         |                             |                   |          |                       |                       |                   |            |
| RA1                                                              | 30.8                        | m                 | 68       | 03/04                 | 1                     | NA                | 39.3       |
| RA2                                                              | 12.5                        | f                 | 40       | 02/05                 | 13                    | 10                | 12.3       |
| RA2                                                              | 10.1                        |                   |          | 06/05                 |                       | 12                | 6          |
| RA3                                                              | 6.0                         | f                 | 51       | 04/05                 | 11                    | 70                | 39         |
| RA4                                                              | 15.9                        | m                 | 68       | 08/05                 | 1                     | 30                | 14         |
| RA4                                                              | 25.5                        |                   |          | 11/05                 |                       | NA                | NA         |
| <b>Synovial fluid from reactive arthritis patients</b>           |                             |                   |          |                       |                       |                   |            |
| ReA1                                                             | 30.0                        | m                 | 28       | 03/04                 | 1                     | 25                | 35         |
| ReA2                                                             | 7.4                         | m                 | 43       | 06/05                 | <1                    | 50                | 116.4      |
| ReA3                                                             | 9.2                         | m                 | 31       | 11/05                 | 1                     | 10                | 0.3        |
| <b>Synovial fluid of psoriatic arthritis patients</b>            |                             |                   |          |                       |                       |                   |            |
| PsA1                                                             | 54.9                        | m                 | 55       | 03/04                 | 10                    | 9/22              | 0.3        |
| PsA2                                                             | 14.2                        | m                 | 68       | 02/05                 | 2                     | 39                | 34         |
| PsA3                                                             | 32.7                        | m                 | 50       | 07/05                 | 19                    | NA                | NA         |
| PsA3                                                             | 24.1                        |                   |          | 09/05                 |                       | NA                | NA         |
| <b>Synovial fluid from ankylosing spondylitis patients</b>       |                             |                   |          |                       |                       |                   |            |
| AS1                                                              | 296.1                       | m                 | 38       | 03/04                 | 18                    | 42                | 49         |
| AS1                                                              | 171.1                       |                   |          | 08/04                 |                       | 20                | 3          |
| AS1                                                              | 130.1                       |                   |          | 09/04                 |                       | NA                | NA         |
| AS1                                                              | 168.3                       |                   |          | 03/05                 |                       | 30                | 14.6       |
| AS1                                                              | 138.6                       |                   |          | 09/05                 |                       | 20                | 3.1        |
| AS2                                                              | 13.6                        | m                 | 73       | 07/04                 | 8                     | 65                | NA         |
| AS2                                                              | 9.4                         |                   |          | 12/04                 |                       | NA                | NA         |
| AS3                                                              | 2.4                         | m                 | 20       | 12/04                 | 5                     | 70                | 86         |
| AS4                                                              | 61.3                        | m                 | 27       | 02/05                 | 18                    | NA                | NA         |
| AS5                                                              | 5.5                         | m                 | 21       | 10/05                 | 1.5                   | 80                | 4.5        |
| <b>Not included in Fig. 5 B</b>                                  |                             |                   |          |                       |                       |                   |            |
| Crohn's disease                                                  | 15.5                        | NA                | NA       | 08/04                 |                       | surgical specimen |            |
| Crohn's disease                                                  | 45.9                        | NA                | NA       | 11/05                 |                       | surgical specimen |            |
| Rheumatoid arthritis                                             | 40.8                        | NA                | NA       | 08/04                 | NA                    | NA                | NA         |
| Rheumatoid arthritis                                             | 14.8                        | NA                | NA       | 09/04                 | NA                    | NA                | NA         |
| undifferentiated SpA                                             | 37.9                        | f                 | 37       | 02/05                 | 1.5                   | 20                | 2          |
| undiff. SpA                                                      | 12.8                        | m                 | 44       | 09/06                 | NA                    | NA                | NA         |
| undiff. arthritis                                                | 3.0                         | m                 | 48       | 8/05                  | 1                     | 18                | 6          |
| Lyme arthritis                                                   | 15.4                        | m                 | 37       | 02/05                 | <1                    | 38                | 7          |
| Lyme arthritis                                                   | 3.5                         | m                 | 21       | 06/05                 | 2                     | NA                | NA         |
| Juvenile RA                                                      | 42.8                        | f                 | 20       | 11/05                 | 6                     | 18                | 1.3        |

*Twist1* transcripts in CD3<sup>+</sup>CD4<sup>+</sup> cells purified from patient material were quantified after 3 h of restimulation with PMA/ionomycin. The mean expression of *twist1* mRNA in total peripheral CD3<sup>+</sup>CD4<sup>+</sup> cells from healthy donors was set to 1. ESR, erythrocyte sedimentation rate (ESR); CRP, C-reactive protein.

**Table S3.** Genes differentially expressed upon ectopic *twist1* overexpression

| Affymetr_No  | Gene symbol   | Gene name                                              | Fold change | t test P value | Vector | Twist1 |
|--------------|---------------|--------------------------------------------------------|-------------|----------------|--------|--------|
| 1449216_at   | Itgae         | integrin, $\alpha$ E, epithelial-associated            | 5.8         | 0.003675582    | 45     | 257    |
| 1432466_a_at | Apoe          | apolipoprotein E                                       | 3.5         | 0.000333012    | 173    | 425    |
| 1419532_at   | Il1r2         | IL-1 receptor, type II                                 | 2.8         | 1.90721E-13    | 784    | 2,192  |
| 1415812_at   | Gsn           | gelsolin                                               | 2.4         | 0.000427877    | 541    | 1,282  |
| 1427076_at   | Mpeg1         | macrophage expressed gene 1                            | 2.1         | 0.027175171    | 168    | 377    |
| 1456393_at   | Pdcd4         | programmed cell death 4                                | 2.0         | 0.000960162    | 800    | 1,573  |
| 1423089_at   | Tmod3         | tropomodulin 3                                         | 2.0         | 2.63289E-06    | 422    | 875    |
| 1426519_at   | P4ha1         | procollagen-proline, 2-oxoglutarate 4-dioxygenase      | 1.9         | 0.030113345    | 233    | 445    |
| 1415947_at   | Creg          | cellular repressor of E1A-stimulated genes             | 1.9         | 2.00686E-06    | 832    | 1,571  |
| 1448710_at   | Cxcr4         | chemokine (C-X-C motif) receptor 4                     | 1.8         | 0.029381152    | 237    | 529    |
| 1455976_x_at | Dbi           | diazepam binding inhibitor                             | 1.7         | 0.001908118    | 1,340  | 2,276  |
| 1450194_a_at | Myb           | myeloblastosis oncogene                                | 1.7         | 0.006922509    | 221    | 443    |
| 1417302_at   | Rcor          | RE1-silencing transcription factor co-repressor        | 1.7         | 0.013680996    | 173    | 384    |
| 1428301_at   | 2610042L04Rik | RIKEN cDNA 2610042L04 gene                             | 1.7         | 4.57606E-05    | 394    | 707    |
| 1438390_s_at | Pttg1         | pituitary tumor-transforming 1                         | 1.7         | 0.001249245    | 625    | 1,044  |
| 1418126_at   | Ccl5          | chemokine (C-C motif) ligand 5                         | 1.6         | 0.014298725    | 937    | 1,699  |
| 1448021_at   | ESTmz98f08.r1 | ESTmz98f08.r1                                          | 1.6         | 0.015998701    | 806    | 1,337  |
| 1418744_s_at | Tesc          | tescalcin                                              | 1.6         | 6.11991E-05    | 841    | 1,507  |
| 1424112_at   | Igf2r         | insulin-like growth factor 2 receptor                  | 1.6         | 0.010457946    | 731    | 1,132  |
| 1460419_a_at | Prkcb         | protein kinase C, $\beta$                              | 1.6         | 0.006315009    | 487    | 815    |
| 1419550_a_at | Stk39         | serine/threonine kinase 39, STE20/SPS1 homologue       | 1.6         | 0.002358995    | 321    | 528    |
| 1425923_at   | Nmyc1         | neuroblastoma myc-related oncogene 1                   | 1.6         | 0.003631455    | 7,548  | 11,408 |
| 1449109_at   | Socs2         | suppressor of cytokine signaling 2                     | 1.6         | 0.001896075    | 805    | 1,319  |
| 1426397_at   | Tgfbr2        | TGF $\beta$ receptor II                                | 1.6         | 0.000741228    | 2,286  | 3,306  |
| 1426970_a_at | Ube1l         | ubiquitin-activating enzyme E1-like                    | 1.6         | 0.030406184    | 297    | 511    |
| 1422414_a_at | Calm2         | calmodulin 2                                           | 1.6         | 1.80435E-08    | 1,587  | 2,338  |
| 1433504_at   | Pygb          | brain glycogen phosphorylase                           | 1.5         | 0.00183523     | 514    | 757    |
| 1450662_at   | Tesk1         | testis specific protein kinase 1                       | 1.5         | 0.000560519    | 766    | 1,187  |
| 1450446_a_at | Socs1         | suppressor of cytokine signaling 1                     | 1.5         | 0.000193353    | 936    | 1,366  |
| 1455065_x_at | Gnpda1        | glucosamine-6-phosphate deaminase 1                    | -1.5        | 0.00169187     | 1,430  | 956    |
| 1448548_at   | Tulp4         | tubby like protein 4                                   | -1.5        | 2.19399E-05    | 1,144  | 820    |
| 1452026_a_at | Pla2g12a      | phospholipase A2, group XIIA                           | -1.5        | 0.013979562    | 1,228  | 826    |
| 1449990_at   | Il2           | IL-2                                                   | -1.5        | 0.000138665    | 8,582  | 5,654  |
| 1449273_at   | Cyfp2         | cytoplasmic FMR1 interacting protein 2                 | -1.5        | 0.000719924    | 1,325  | 983    |
| 1417240_at   | Zyx           | zyxin                                                  | -1.5        | 0.000445837    | 876    | 601    |
| 1425787_a_at | Sytl3         | synaptotagmin-like 3                                   | -1.5        | 6.82725E-06    | 2,239  | 1,478  |
| 1426245_s_at | Mapre2        | microtubule-associated protein, RP/EB family, 2        | -1.5        | 0.022816609    | 1,224  | 791    |
| 1417679_at   | Gfi1          | growth factor independent 1                            | -1.5        | 8.3341E-05     | 2,506  | 1,619  |
| 1423467_at   | Ms4a4b        | membrane-spanning 4-domains A, member 4B               | -1.5        | 0.001242527    | 4,717  | 3,005  |
| 1456226_x_at | Ddr1          | discoidin domain receptor family, member 1             | -1.6        | 0.004473965    | 593    | 367    |
| 1425947_at   | Ifng          | interferon $\gamma$                                    | -1.6        | 0.018605196    | 6,646  | 4,323  |
| 1426816_at   | Ccdc64        | coiled-coil domain containing 64                       | -1.6        | 0.000603641    | 705    | 438    |
| 1422473_at   | Pde4b         | phosphodiesterase 4B, cAMP specific                    | -1.6        | 1.66039E-05    | 1,133  | 627    |
| 1420965_a_at | Enc1          | ectodermal-neural cortex 1                             | -1.7        | 0.001533107    | 1,510  | 894    |
| 1421065_at   | Jak2          | Janus kinase 2                                         | -1.8        | 1.41758E-07    | 4,700  | 2,734  |
| 1419561_at   | Ccl3          | chemokine (C-C motif) ligand 3                         | -1.8        | 0.03228739     | 3,034  | 1,616  |
| 1450387_s_at | Ak3l1         | adenylate kinase 3 alpha-like 1                        | -1.8        | 5.09427E-06    | 744    | 427    |
| 1415995_at   | Casp6         | caspase 6                                              | -1.8        | 0.000232808    | 1,137  | 573    |
| 1419412_at   | Xcl1          | chemokine (C motif) ligand 1                           | -1.9        | 0.001140306    | 2,274  | 1,208  |
| 1422812_at   | Cxcr6         | chemokine (C-X-C motif) receptor 6                     | -1.9        | 0.000118139    | 739    | 375    |
| 1416593_at   | Glrx1         | glutaredoxin 1 (thioltransferase)                      | -2.0        | 0.000130173    | 853    | 444    |
| 1449911_at   | Lag3          | lymphocyte-activation gene 3                           | -2.0        | 0.000660697    | 1,455  | 638    |
| 1416899_at   | Utf1          | undifferentiated embryonic cell transcription factor 1 | -2.0        | 0.000102794    | 663    | 378    |
| 1416926_at   | Trp53inp1     | transformation related p53 inducible nuclear protein 1 | -2.1        | 0.00167533     | 2,514  | 1,087  |
| 1421578_at   | Ccl4          | chemokine (C-C motif) ligand 4                         | -2.1        | 0.000600675    | 7,169  | 3,053  |
| 1419247_at   | Rgs2          | regulator of G-protein signaling 2                     | -2.2        | 8.12651E-06    | 830    | 385    |
| 1416871_at   | Adam8         | a disintegrin and metalloprotease domain 8             | -2.5        | 0.000112885    | 716    | 281    |
| 1417256_at   | Mmp13         | matrix metalloproteinase 13                            | -3.4        | 1.70802E-06    | 689    | 190    |

Splenic DO11.10 cells were activated *in vitro* with the cognate peptide OVA<sub>327-339</sub> in the presence of 1 ng/ml IL-12 and 1 ng/ml IL-2. On day 2, cells were infected with control virus or *twist1*-encoding virus. On day 5, cells were sorted according to expression of the viral marker gene *gfp*. Cells were restimulated for 4 h with PMA/ionomycin. The transcriptional profiles of duplicates of cultures were compared using Affymetrix Murine Genome (MG) 430A 2.0 GeneChip arrays. The Affymetrix probe set ID (Affymetr\_No), mean fold change, significance of differential expression (*t* test), and mean signal intensity (Vector, Twist1) of two arrays per group are shown. Genes were filtered according to the following criteria: fold change  $\geq 1.5$ ; difference of means  $\geq 200$ ; P value  $\leq 0.05$ ; and excluding immunoglobulin genes.

**Table S4.** *Twist1* knock-down results in a higher inflammatory response in murine arthritis

| Mouse  | Acute inflammation |                  |        |                   |          | Chronic inflammation |             |                     | Sum   |         |
|--------|--------------------|------------------|--------|-------------------|----------|----------------------|-------------|---------------------|-------|---------|
|        | Exudate            | Gran. inf.<br>SM | Fibrin | Periart.<br>gran. | Hyperpl. | Mono. inf<br>SM      | Peri. mono. | Cartilage<br>destr. | Acute | Chronic |
| scrT1  | 0                  | 1                | 0      | 0                 | 0        | 0.5                  | 0           | 0                   | 1     | 0.5     |
| scrT2  | 0                  | 1                | 0      | 0                 | 1        | 1                    | 2           | 0                   | 1     | 4       |
| scrT3  | 0                  | 1                | 1      | 0                 | 0        | 0.5                  | 0           | 0                   | 2     | 0.5     |
| scrT4  | 1                  | 1                | 1      | 0                 | 0        | 1                    | 0           | 0                   | 3     | 1       |
| scrT5  | 0                  | 1                | 1      | 0                 | 0        | 1                    | 0           | 0                   | 2     | 1       |
| Twist1 | 1                  | 1                | 1      | 1                 | 0        | 1.5                  | 1           | 0                   | 4     | 2.5     |
| Twist2 | 1                  | 2                | 1      | 1                 | 1        | 2                    | 1           | 0                   | 5     | 4       |
| Twist3 | 1                  | 2                | 1      | 1                 | 1        | 1.5                  | 1           | 0                   | 5     | 3.5     |
| Twist4 | 2                  | 3                | 1      | 1                 | 1        | 2                    | 1           | 1                   | 7     | 4       |
| Twist5 | 2                  | 3                | 1      | 1                 | 0        | 2                    | 2           | 1                   | 7     | 4       |

After i.v. cell transfer of 12-d-old GFP<sup>+</sup> DO11.10 Th1 cells expressing *twist1*-targeting shRNA (Twist1–5) or scrambled *twist1* control shRNA (scrT1–5), arthritis was induced in the recipient SCID mice by intraarticular injection of cationized OVA into the knee joint. 21 d later, knee joint sections were stained for hematoxylin/ eosin and scored for exudates, granulocyte infiltration (gran. inf. SM), hyperplasia (hyperpl.), fibroblast proliferation/ mononuclear cell infiltration (mono. inf. SM), periarticular mononuclear cell infiltration (peri. mono.; each scoring 0–3), bone/cartilage destruction (scoring 0–4), and an additional score of 1 for fibrin deposition and periarticular granulocyte infiltration (periart. gran), resulting in a maximum score of 21.

**Table S5.** Primer sequences

| <b>Construction of shRNA-expression retrovirus</b>   |                                                              |
|------------------------------------------------------|--------------------------------------------------------------|
| XbaI EF1aGFP forward                                 | TTCTAGAGACGATAAGCTTTGCAAAGATG                                |
| EcoR5 EF1aGFP reverse                                | TGATATCCATATGACTAGTCCCCGAAGTTG                               |
| shTwist1 forward                                     | TGCTGAGCAAGATTCAGACCTTCAAGAGAGGTCTGAATCTTGCTCAGCTTTTTTC      |
| shTwist1 reverse                                     | TCGAGAAAAAAGCTGAGCAAGATTCAGACCTCTCTTGAAGGTCTGAATCTTGCTCAGCA  |
| scr shTwist1 forward                                 | TGCTATCGAGAAGATCAGCCTTCAAGAGAGGTCTGATCTTCTCGATAGCTTTTTTC     |
| scr shTwist1 reverse                                 | TCGAGAAAAAAGCTATCGAGAAGATCAGCCTCTCTTGAAGGTCTGATCTTCTCGATAGCA |
| XhoI U6shRNA forward                                 | TATCTCGAGCAGAGATCCAGTTTGGTTAGTACC                            |
| U6shRNA reverse                                      | TAGGTCCCTCGACCTGCTGG                                         |
| <b>Construction of protein expression retrovirus</b> |                                                              |
| BglII mTbet forward                                  | ATGGAAGATCTATGGGCATCGTGGAGCC                                 |
| XhoI mTbet reverse                                   | ATCCGCTCGAGTCAGTTGGGAAAATAATTATAAAAC                         |
| BglII mTwist1 forward                                | GAAGATCTATGATGCAGGACGTGTCCAGC                                |
| XhoI mTwist reverse                                  | ATCCGCTCGAGCTAGTGGGACGCGGACATGG                              |
| BglII hMikBa forward                                 | ATGGAAGATCTATGTTCCAGGCGGCCGA                                 |
| Sall hMikBa reverse                                  | TTCGTGCGACTATAACGTCAGACGCTGGC                                |
| <b>Real-time PCR</b>                                 |                                                              |
| Murine HPRT forward                                  | GCTGGTGAAAAGGACCTCT                                          |
| Murine HPRT reverse                                  | CACAGGACTAGAACACCTGC                                         |
| Murine Twist2 forward                                | GCATCCTGGCCAACGTGC                                           |
| Murine Twist2 reverse                                | TCCATGCGCCACACGGAG                                           |
| Murine Twist1 forward                                | CGCACGCAGTCGCTGAACG                                          |
| Murine/hum Twist1 reverse                            | GACGCGGACATGGACCAGG                                          |
| Human Twist1 forward                                 | GGCACCCAGTCGCTGAACG                                          |
| Human UbcH5 forward                                  | TCTTGACAATTCATTTCCCAACAG                                     |
| Human UbcH5 reverse                                  | TCAGGCACTAAAGGATCATCTGG                                      |
